# Supplementary material for: Comparative Analysis of Eight Mitogenomes of Bark Beetles and Their Phylogenetic Implications
Source: MDPI journal article supplement (doi:10.3390/insects12100949), 2021-10-18

**Table S1.** The list of sample information of bark beetles.

| <b>Species</b>                   | <b>Accession no.</b> | <b>Species</b>                  | <b>Accession no.</b> |
|----------------------------------|----------------------|---------------------------------|----------------------|
| <i>Hylates brunneus</i>          | NC_036262.1          | Scolytinae BMNH 1039855         | X035164.1            |
| <i>Hylates attenuatus</i>        | NC_036290.1          | Scolytinae BMNH1274287          | KT696206.1           |
| <i>Pityophthorus pubescens</i>   | NC_036288.1          | Scolytinae BMNH1040341          | KX035192.1           |
| <i>Pityogenes bidentatus</i>     | NC_036289.1          | Scolytinae BMNH1039965          | KX035170.1           |
| <i>Ips acuminatus</i>            | MK988441             | Scolytinae BMNH1043104          | KX035197.1           |
| <i>Ips sexdentatus</i>           | NC_036281.1          | Scolytinae BMNH1040075          | KX035181.1           |
| <i>Orthotomicus laricis</i>      | NC_036291.1          | Scolytinae BMNH1040174          | KX035185.1           |
| <i>Dryocoetes autographus</i>    | NC_036287.1          | Scolytinae BMNH1040327          | KX035189.1           |
| <i>Dryocoetes villosus</i>       | NC_036282.1          | Scolytinae BMNH1040118          | KX035183.1           |
| <i>Xylosandrus morigerus</i>     | NC_036283.1          | Scolytinae BMNH1040002          | KX035174.1           |
| <i>Xylosandrus germanus</i>      | NC_036280.1          | Scolytinae BMNH1039905          | KX035168.1           |
| <i>Xylosandrus crassiusculus</i> | NC_036284.1          | <i>Hypothenemus</i> BMNH1040235 | KX035186.1           |
| <i>Anisandrus dispar</i>         | NC_036293.1          | <i>Hypothenemus</i> BMNH1039837 | KX035163.1           |
| <i>Cyclorhipidion bodoanum</i>   | NC_036295            | <i>Hypothenemus</i> BMNH1040003 | KX035175.1           |
| <i>Gnathotrichus materiarius</i> | NC_036294.1          | <i>Hypothenemus</i> BMNH1039866 | KX035165.1           |
| <i>Trypophloeus asperatus</i>    | NC_036285.1          | Scolytinae BMNH1040351          | KX035193.1           |
| <i>Trypodendron signatum</i>     | NC_036292.1          | Scolytinae BMNH1039994          | KX035172.1           |
| <i>Trypodendron domesticum</i>   | NC_036286.1          | Scolytinae BMNH1039990          | KX035171.1           |
| <i>Sitophilus oryzae</i>         | KX373615             | Scolytinae BMNH1040265          | KX035187.1           |
| <i>Sitophilus zeamais</i>        | KX373614             | Scolytinae BMNH10403133         | KX035199.1           |
| <i>Xyleborus</i> BMNH1040067     | KX035179.1           | Scolytinae BMNH1040331          | KX035190.1           |

**Table S2.** Annotation of the mitogenome of *Orthotomicus erosus*.

| Gene  | Direction | Start position | Stop position | Length | Anticodon | Start Codon | Stop Codon | IGS  |
|-------|-----------|----------------|---------------|--------|-----------|-------------|------------|------|
| trnQ  | R         | 1              | 70            | 70     | CAT       |             |            |      |
| trnM  | F         | 116            | 183           | 68     | TTG       |             |            | 45   |
| ND2   | F         | 202            | 1191          | 990    |           | ATT         | TAA        | 18   |
| trnW  | F         | 1211           | 1278          | 68     | TCA       |             |            | 19   |
| trnC  | R         | 1298           | 1363          | 66     | GCA       |             |            | 19   |
| trnY  | R         | 1394           | 1459          | 66     | GTA       |             |            | 30   |
| COI   | F         | 1506           | 3050          | 1545   |           | ATA         | TAA        | 46   |
| trnL2 | F         | 3046           | 3112          | 67     | TAA       |             |            | -5   |
| COII  | F         | 3068           | 3796          | 729    |           | ATG         | TAA        | -45  |
| trnK  | F         | 3804           | 3874          | 71     | CTT       |             |            | 7    |
| trnD  | F         | 3887           | 3954          | 68     | GTC       |             |            | 12   |
| ATP8  | F         | 3964           | 4125          | 162    |           | ATA         | TAG        | 9    |
| ATP6  | F         | 4119           | 4802          | 684    |           | ATG         | TAA        | -7   |
| COIII | F         | 4807           | 5601          | 795    |           | ATG         | TAA        | 4    |
| trnG  | F         | 5639           | 5704          | 66     | TCC       |             |            | 37   |
| ND3   | F         | 5705           | 6058          | 354    |           | ATT         | TAG        | 0    |
| trnA  | F         | 6106           | 6173          | 68     | TGC       |             |            | 47   |
| trnR  | F         | 6184           | 6249          | 66     | TCG       |             |            | 10   |
| trnN  | F         | 6325           | 6389          | 65     | GTT       |             |            | 75   |
| trnS1 | F         | 6390           | 6456          | 67     | GCT       |             |            | 0    |
| trnE  | F         | 6457           | 6523          | 67     | TTC       |             |            | 0    |
| trnF  | R         | 6548           | 6616          | 69     | GAA       |             |            | 24   |
| ND5   | R         | 6617           | 8326          | 1710   |           | ATT         | TAA        | 0    |
| trnH  | R         | 8342           | 8406          | 65     | GTG       |             |            | 15   |
| ND4   | R         | 8469           | 9815          | 1347   |           | ATG         | TAA        | 62   |
| ND4L  | R         | 9809           | 10096         | 288    |           | ATG         | TAG        | -7   |
| trnT  | F         | 10114          | 10180         | 67     | TGT       |             |            | 17   |
| trnP  | R         | 10181          | 10248         | 68     | TGG       |             |            | 0    |
| ND6   | F         | 10266          | 10772         | 507    |           | ATA         | TAA        | 17   |
| CytB  | F         | 10781          | 11920         | 1140   |           | ATG         | TAA        | 8    |
| trnS2 | F         | 11945          | 12012         | 68     | TGA       |             |            | 24   |
| ND1   | R         | 12031          | 12957         | 927    |           | ATT         | TAA        | 18   |
| trnL1 | R         | 12976          | 13043         | 68     | TAG       |             |            | 18   |
| rrnL  | R         | 13082          | 14390         | 1309   |           |             |            | 38   |
| trnV  | R         | 14421          | 14485         | 65     | TAC       |             |            | 30   |
| rrnS  | R         | 14484          | 15269         | 786    |           |             |            | -2   |
| trnI  | F         | 16687          | 16753         | 67     | GAT       |             |            | 1417 |

**Table S3.** Annotation of the mitogenome of *Dryocoetes hectographus*.

| Gene  | Direction | Start Position | Stop Position | Length | Anticodon | Start Codon | Stop Codon | IGS |
|-------|-----------|----------------|---------------|--------|-----------|-------------|------------|-----|
| trnQ  | R         | 1              | 69            | 69     | CAT       |             |            |     |
| trnM  | F         | 69             | 139           | 71     | TTG       |             |            | -1  |
| ND2   | F         | 113            | 1132          | 1020   |           | ATG         | TAA        | -27 |
| trnW  | F         | 1132           | 1197          | 66     | TCA       |             |            | -1  |
| trnC  | R         | 1197           | 1258          | 62     | GCA       |             |            | -1  |
| trnY  | R         | 1262           | 1325          | 64     | GTA       |             |            | 3   |
| COI   | F         | 1318           | 2865          | 1548   |           | ATT         | TAA        | -8  |
| trnL2 | F         | 2861           | 2925          | 65     | TAA       |             |            | -5  |
| COII  | F         | 2926           | 3612          | 687    |           | ATT         | TAA        | 0   |
| trnK  | F         | 3613           | 3683          | 71     | CTT       |             |            | 0   |
| trnD  | F         | 3684           | 3751          | 68     | GTC       |             |            | 0   |
| ATP8  | F         | 3752           | 3907          | 156    |           | ATT         | TAG        | 0   |
| ATP6  | F         | 3901           | 4572          | 672    |           | ATG         | TAA        | -7  |
| COIII | F         | 4573           | 5355          | 783    |           | ATG         | TAA        | 0   |
| trnG  | F         | 5362           | 5424          | 63     | TCC       |             |            | 6   |
| ND3   | F         | 5425           | 5778          | 354    |           | ATA         | TAG        | 0   |
| trnA  | F         | 5777           | 5838          | 62     | TGC       |             |            | -2  |
| trnR  | F         | 5840           | 5907          | 68     | TCG       |             |            | 1   |
| trnN  | F         | 5909           | 5972          | 64     | GTT       |             |            | 1   |
| trnS1 | F         | 5973           | 6040          | 68     | GCT       |             |            | 0   |
| trnE  | F         | 6041           | 6103          | 63     | TTC       |             |            | 0   |
| trnF  | R         | 6127           | 6189          | 63     | GAA       |             |            | 23  |
| ND5   | R         | 6143           | 7858          | 1716   |           | ATT         | TAG        | -47 |
| trnH  | R         | 7898           | 7963          | 66     | GTG       |             |            | 39  |
| ND4   | R         | 7944           | 9290          | 1347   |           | ATG         | TAA        | -20 |
| ND4L  | R         | 9294           | 9587          | 294    |           | ATG         | TAG        | 3   |
| trnT  | F         | 9589           | 9652          | 64     | TGT       |             |            | 1   |
| trnP  | R         | 9653           | 9715          | 63     | TGG       |             |            | 0   |
| ND6   | F         | 9718           | 10227         | 510    |           | ATT         | TAA        | 2   |
| CytB  | F         | 10227          | 11369         | 1143   |           | ATG         | TAG        | -1  |
| trnS2 | F         | 11368          | 11435         | 68     | TGA       |             |            | -2  |
| ND1   | R         | 11453          | 12379         | 927    |           | ATA         | TAA        | 17  |
| trnL1 | R         | 12405          | 12470         | 66     | TAG       |             |            | 25  |
| rrnL  | R         | 12472          | 13756         | 1285   |           |             |            | 1   |
| trnV  | R         | 13758          | 13822         | 65     | TAC       |             |            | 1   |
| rrnS  | R         | 13821          | 14596         | 776    |           |             |            | -2  |
| trnI  | F         | 15432          | 15495         | 64     | GAT       |             |            | 835 |

**Table S4.** Annotation of the mitogenome of *Polygraphus poligraphus*.

| Gene  | Direction | Start Position | Stop Position | Length | Anticodon | Start Codon | Stop Codon | IGS |
|-------|-----------|----------------|---------------|--------|-----------|-------------|------------|-----|
| trnI  | F         | 1              | 63            | 63     | GAT       |             |            |     |
| trnQ  | R         | 1025           | 1092          | 68     | CAT       |             |            | 961 |
| trnM  | F         | 1092           | 1160          | 69     | TTG       |             |            | -1  |
| ND2   | F         | 1161           | 2165          | 1005   |           | ATT         | TAA        | 0   |
| trnW  | F         | 2168           | 2235          | 68     | TCA       |             |            | 2   |
| trnC  | R         | 2236           | 2302          | 67     | GCA       |             |            | 0   |
| trnY  | R         | 2307           | 2371          | 65     | GTA       |             |            | 4   |
| COI   | F         | 2364           | 3908          | 1545   |           | ATT         | TAA        | -8  |
| trnL2 | F         | 3911           | 3973          | 63     | TAA       |             |            | 2   |
| COII  | F         | 3995           | 4687          | 693    |           | ATA         | TAA        | 21  |
| trnK  | F         | 4653           | 4723          | 71     | CTT       |             |            | -35 |
| trnD  | F         | 4723           | 4786          | 64     | GTC       |             |            | -1  |
| ATP8  | F         | 4787           | 4945          | 159    |           | ATT         | TAG        | 0   |
| ATP6  | F         | 4939           | 5613          | 675    |           | ATG         | TAA        | -7  |
| COIII | F         | 5613           | 6398          | 786    |           | ATG         | TAA        | -1  |
| trnG  | F         | 6405           | 6468          | 64     | TCC       |             |            | 6   |
| ND3   | F         | 6469           | 6822          | 354    |           | ATA         | TAA        | 0   |
| trnA  | F         | 6831           | 6894          | 64     | TGC       |             |            | 8   |
| trnR  | F         | 6895           | 6958          | 64     | TCG       |             |            | 0   |
| trnN  | F         | 6960           | 7024          | 65     | GTT       |             |            | 1   |
| trnS1 | F         | 7024           | 7083          | 60     | GCT       |             |            | -1  |
| trnE  | F         | 7085           | 7145          | 61     | TTC       |             |            | 1   |
| ND5   | R         | 7155           | 8831          | 1677   |           | ATG         | TAA        | 9   |
| trnH  | R         | 8907           | 8973          | 67     | GTG       |             |            | 75  |
| ND4   | R         | 8973           | 10301         | 1329   |           | ATG         | TAA        | -1  |
| ND4L  | R         | 10295          | 10588         | 294    |           | ATG         | TAG        | -7  |
| trnT  | F         | 10592          | 10656         | 65     | TGT       |             |            | 3   |
| trnP  | R         | 10657          | 10720         | 64     | TGG       |             |            | 0   |
| ND6   | F         | 10723          | 11229         | 507    |           | ATG         | TAA        | 2   |
| CytB  | F         | 11230          | 12369         | 1140   |           | ATG         | TAA        | 0   |
| trnS2 | F         | 12369          | 12434         | 66     | TGA       |             |            | -1  |
| ND1   | R         | 12444          | 13379         | 936    |           | ATT         | TAA        | 9   |
| trnL1 | R         | 13399          | 13465         | 67     | TAG       |             |            | 19  |
| rrnL  | R         | 13426          | 14759         | 1334   |           |             |            | -40 |
| trnV  | R         | 14748          | 14815         | 68     | TAC       |             |            | -12 |
| rrnS  | R         | 14815          | 15586         | 772    |           |             |            | -1  |

**Table S5.** Annotation of the mitogenome of *Dendroctonus micans*.

| Gene      | Direction | Start Position | Stop Position | Length | Anticodon | Start Codon | Stop Codon | IGS  |
|-----------|-----------|----------------|---------------|--------|-----------|-------------|------------|------|
| trnM      | F         | 1              | 66            | 66     | TTG       |             |            |      |
| ND2       | F         | 88             | 1089          | 1002   |           | ATT         | TAA        | 21   |
| trnW      | F         | 1088           | 1151          | 64     | TCA       |             |            | -2   |
| trnC      | R         | 1151           | 1212          | 62     | GCA       |             |            | -1   |
| trnY      | R         | 1216           | 1278          | 63     | GTA       |             |            | 3    |
| COI       | F         | 1271           | 2815          | 1545   |           | ATT         | TAA        | -8   |
| trnL2     | F         | 2811           | 2875          | 65     | TAA       |             |            | -5   |
| COII      | F         | 2876           | 3559          | 684    |           | ATT         | TAA        | 0    |
| trnK      | F         | 3561           | 3631          | 71     | CTT       |             |            | 1    |
| trnD      | F         | 3632           | 3695          | 64     | GTC       |             |            | 0    |
| ATP8      | F         | 3696           | 3851          | 156    |           | ATA         | TAA        | 0    |
| ATP6      | F         | 3845           | 4516          | 672    |           | ATG         | TAA        | -7   |
| COIII     | F         | 4522           | 5304          | 783    |           | ATG         | TAA        | 5    |
| trnG      | F         | 5311           | 5374          | 64     | TCC       |             |            | 6    |
| ND3       | F         | 5375           | 5728          | 354    |           | ATT         | TAG        | 0    |
| trnA      | F         | 5727           | 5787          | 61     | TGC       |             |            | -2   |
| trnR      | F         | 5786           | 5852          | 67     | TCG       |             |            | -2   |
| trnN      | F         | 5851           | 5916          | 66     | GTT       |             |            | -2   |
| trnS1     | F         | 5917           | 5981          | 65     | GCT       |             |            | 0    |
| trnE      | F         | 5981           | 6043          | 63     | TTC       |             |            | -1   |
| trnF      | R         | 6042           | 6104          | 63     | GAA       |             |            | -2   |
| ND5       | R         | 6061           | 7770          | 1710   |           | ATT         | TAG        | -44  |
| trnH      | R         | 7813           | 7873          | 61     | GTG       |             |            | 42   |
| ND4       | R         | 7857           | 9203          | 1347   |           | ATG         | TAA        | -17  |
| ND4L      | R         | 9197           | 9493          | 297    |           | ATG         | TAA        | -7   |
| trnT      | F         | 9497           | 9559          | 63     | TGT       |             |            | 3    |
| trnP      | R         | 9560           | 9622          | 63     | TGG       |             |            | 0    |
| ND6       | F         | 9625           | 10128         | 504    |           | ATT         | TAA        | 2    |
| CytB      | F         | 10128          | 11267         | 1140   |           | ATG         | TAA        | -1   |
| trnS2     | F         | 11270          | 11334         | 65     | TGA       |             |            | 2    |
| ND1       | R         | 11352          | 12281         | 930    |           | ATA         | TAG        | 17   |
| trnL1     | R         | 12301          | 12362         | 62     | TAG       |             |            | 19   |
| rrnL      | R         | 12325          | 13629         | 1305   |           |             |            | -38  |
| trnV      | R         | 13657          | 13722         | 66     | TAC       |             |            | 27   |
| rrnS      | R         | 13720          | 14486         | 767    |           |             |            | -3   |
| trnI(gat) | F         | 16053          | 16117         | 65     | GAT       |             |            | 1566 |
| trnQ      | R         | 16738          | 16807         | 70     | CAT       |             |            | 620  |

**Table S6** Annotation of the mitogenome of *Ips hauseri*

| Gene  | Direction | Start Position | Stop Position | Length | Anticodon | Start Codon | Stop Codon | IGS |
|-------|-----------|----------------|---------------|--------|-----------|-------------|------------|-----|
| trnQ  | R         | 1              | 70            | 70     | CAT       |             |            |     |
| trnM  | F         | 123            | 193           | 71     | TTG       |             |            | 52  |
| ND2   | F         | 194            | 1204          | 1011   |           | ATA         | TAA        | 0   |
| trnW  | F         | 1226           | 1292          | 67     | TCA       |             |            | 21  |
| trnC  | R         | 1309           | 1373          | 65     | GCA       |             |            | 16  |
| trnY  | R         | 1439           | 1506          | 68     | GTA       |             |            | 65  |
| COI   | F         | 1470           | 3050          | 1581   |           | ATT         | TAA        | -37 |
| trnL2 | F         | 3046           | 3113          | 68     | TAA       |             |            | -5  |
| COII  | F         | 3114           | 3794          | 681    |           | ATT         | TAA        | 0   |
| trnK  | F         | 3835           | 3905          | 71     | CTT       |             |            | 40  |
| trnD  | F         | 3951           | 4019          | 69     | GTC       |             |            | 45  |
| ATP8  | F         | 4020           | 4190          | 171    |           | ATC         | TAG        | 0   |
| ATP6  | F         | 4184           | 4864          | 681    |           | ATG         | TAA        | -7  |
| COIII | F         | 4876           | 5658          | 783    |           | ATG         | TAA        | 11  |
| trnG  | F         | 5714           | 5783          | 70     | TCC       |             |            | 55  |
| ND3   | F         | 5784           | 6137          | 354    |           | ATT         | TAA        | 0   |
| trnA  | F         | 6150           | 6218          | 69     | TGC       |             |            | 12  |
| trnR  | F         | 6317           | 6386          | 70     | TCG       |             |            | 98  |
| trnN  | F         | 6418           | 6483          | 66     | GTT       |             |            | 31  |
| trnS1 | F         | 6484           | 6551          | 68     | GCT       |             |            | 0   |
| trnE  | F         | 6554           | 6621          | 68     | TTC       |             |            | 2   |
| trnF  | R         | 6656           | 6723          | 68     | GAA       |             |            | 34  |
| ND5   | R         | 6781           | 8488          | 1708   |           | ATC         | T-         | 57  |
| trnH  | R         | 8489           | 8557          | 69     | GTG       |             |            | 0   |
| ND4   | R         | 8570           | 9907          | 1338   |           | ATG         | TAA        | 12  |
| ND4L  | R         | 9921           | 10214         | 294    |           | ATA         | TAG        | 13  |
| trnT  | F         | 10231          | 10297         | 67     | TGT       |             |            | 16  |
| trnP  | R         | 10298          | 10365         | 68     | TGG       |             |            | 0   |
| ND6   | F         | 10377          | 10874         | 498    |           | ATT         | TAA        | 11  |
| CytB  | F         | 10924          | 12063         | 1140   |           | ATG         | TAA        | 49  |
| trnS2 | F         | 12172          | 12240         | 69     | TGA       |             |            | 108 |
| ND1   | R         | 12276          | 13212         | 937    |           | TTG         | T-         | 35  |
| trnL1 | R         | 13214          | 13283         | 70     | TAG       |             |            | 1   |
| rrnL  | R         | 13300          | 14660         | 1361   |           |             |            | 16  |
| trnV  | R         | 14654          | 14720         | 67     | TAC       |             |            | -7  |
| rrnS  | R         | 14719          | 15516         | 798    |           |             |            | -2  |

**Table S7.** Annotation of the mitogenome of *Ips subelongatus*.

| Gene  | Direction | Start Position | Stop Position | Length | Anticodon | Start Codon | Stop Codon | IGS |
|-------|-----------|----------------|---------------|--------|-----------|-------------|------------|-----|
| trnQ  | R         | 1              | 71            | 71     | CAT       |             |            |     |
| trnM  | F         | 140            | 210           | 71     | TTG       |             |            | 68  |
| ND2   | F         | 214            | 1221          | 1008   |           | ATA         | TAA        | 3   |
| trnW  | F         | 1223           | 1289          | 67     | TCA       |             |            | 1   |
| trnC  | R         | 1296           | 1359          | 64     | GCA       |             |            | 6   |
| trnY  | R         | 1373           | 1440          | 68     | GTA       |             |            | 13  |
| COI   | F         | 1452           | 2999          | 1548   |           | ATT         | TAA        | 11  |
| trnL2 | F         | 3012           | 3079          | 68     | TAA       |             |            | 12  |
| COII  | F         | 3080           | 3760          | 681    |           | ATC         | TAA        | 0   |
| trnK  | F         | 3804           | 3874          | 71     | CTT       |             |            | 43  |
| trnD  | F         | 3880           | 3947          | 68     | GTC       |             |            | 5   |
| ATP8  | F         | 3948           | 4121          | 174    |           | ATT         | TAG        | 0   |
| ATP6  | F         | 4115           | 4795          | 681    |           | ATG         | TAA        | -7  |
| COIII | F         | 4820           | 5602          | 783    |           | ATG         | TAA        | 24  |
| trnG  | F         | 5630           | 5700          | 71     | TCC       |             |            | 27  |
| ND3   | F         | 5704           | 6054          | 351    |           | ATC         | TAA        | 3   |
| trnA  | F         | 6064           | 6128          | 65     | TGC       |             |            | 9   |
| trnR  | F         | 6147           | 6215          | 69     | TCG       |             |            | 18  |
| trnN  | F         | 6248           | 6314          | 67     | GTT       |             |            | 32  |
| trnS1 | F         | 6315           | 6381          | 67     | GCT       |             |            | 0   |
| trnE  | F         | 6384           | 6448          | 65     | TTC       |             |            | 2   |
| trnF  | R         | 6456           | 6524          | 69     | GAA       |             |            | 7   |
| ND5   | R         | 6534           | 8276          | 1743   |           | ATT         | TAA        | 9   |
| trnH  | R         | 8277           | 8348          | 72     | GTG       |             |            | 0   |
| ND4   | R         | 8373           | 9710          | 1338   |           | ATG         | TAA        | 24  |
| ND4L  | R         | 9726           | 10019         | 294    |           | ATA         | TAA        | 15  |
| trnT  | F         | 10067          | 10133         | 67     | TGT       |             |            | 47  |
| trnP  | R         | 10134          | 10199         | 66     | TGG       |             |            | 0   |
| ND6   | F         | 10202          | 10711         | 510    |           | ATT         | TAA        | 2   |
| CytB  | F         | 10761          | 11897         | 1137   |           | ATG         | TAA        | 49  |
| trnS2 | F         | 11912          | 11981         | 70     | TGA       |             |            | 14  |
| ND1   | R         | 12001          | 12948         | 948    |           | TTG         | TAA        | 19  |
| trnL1 | R         | 12950          | 13018         | 69     | TAG       |             |            | 1   |
| rrnL  | R         | 13004          | 14367         | 1364   |           |             |            | -15 |
| trnV  | R         | 14383          | 14448         | 66     | TAC       |             |            | 15  |
| rrnS  | R         | 14447          | 15259         | 813    |           |             |            | -2  |

**Table S8.** Annotation of the mitogenome of *Ips typographus*.

| Gene  | Direction | Start Position | Stop Position | Length | Anticodon | Start Codon | Stop Codon | IGS |
|-------|-----------|----------------|---------------|--------|-----------|-------------|------------|-----|
| trnQ  | R         | 1              | 71            | 71     | CAT       |             |            |     |
| trnM  | F         | 89             | 160           | 72     | TTG       |             |            | 17  |
| ND2   | F         | 164            | 1171          | 1008   |           | ATA         | TAA        | 3   |
| trnW  | F         | 1172           | 1239          | 68     | TCA       |             |            | 0   |
| trnC  | R         | 1269           | 1338          | 70     | GCA       |             |            | 29  |
| trnY  | R         | 1344           | 1410          | 67     | GTA       |             |            | 5   |
| COI   | F         | 1439           | 3007          | 1569   |           | ATT         | TAA        | 28  |
| trnL2 | F         | 3031           | 3099          | 69     | TAA       |             |            | 23  |
| COII  | F         | 3100           | 3780          | 681    |           | ATC         | TAA        | 0   |
| trnK  | F         | 3811           | 3882          | 72     | CTT       |             |            | 30  |
| trnD  | F         | 3898           | 3965          | 68     | GTC       |             |            | 15  |
| ATP8  | F         | 3966           | 4130          | 165    |           | ATT         | TAG        | 0   |
| ATP6  | F         | 4127           | 4804          | 678    |           | ATA         | TAA        | -4  |
| COIII | F         | 4810           | 5592          | 783    |           | ATG         | TAA        | 5   |
| trnG  | F         | 5618           | 5683          | 66     | TCC       |             |            | 25  |
| ND3   | F         | 5687           | 6037          | 351    |           | ATT         | TAA        | 3   |
| trnA  | F         | 6049           | 6117          | 69     | TGC       |             |            | 11  |
| trnR  | F         | 6139           | 6208          | 70     | TCG       |             |            | 21  |
| trnN  | F         | 6241           | 6306          | 66     | GTT       |             |            | 32  |
| trnS1 | F         | 6307           | 6374          | 68     | GCT       |             |            | 0   |
| trnE  | F         | 6376           | 6445          | 70     | TTC       |             |            | 1   |
| trnF  | R         | 6450           | 6520          | 71     | GAA       |             |            | 4   |
| ND5   | R         | 6551           | 8293          | 1743   |           | ATT         | TAA        | 30  |
| trnH  | R         | 8294           | 8359          | 66     | GTG       |             |            | 0   |
| ND4   | R         | 8392           | 9729          | 1338   |           | ATG         | TAA        | 32  |
| ND4L  | R         | 9736           | 10113         | 378    |           | ATT         | TAA        | 6   |
| trnT  | F         | 10050          | 10116         | 67     | TGT       |             |            | -64 |
| trnP  | R         | 10117          | 10183         | 67     | TGG       |             |            | 0   |
| ND6   | F         | 10195          | 10692         | 498    |           | ATT         | TAA        | 11  |
| CytB  | F         | 10785          | 11927         | 1143   |           | ATA         | TAA        | 92  |
| trnS2 | F         | 12019          | 12088         | 70     | TGA       |             |            | 91  |
| ND1   | R         | 12108          | 13055         | 948    |           | TTG         | TAA        | 19  |
| trnL1 | R         | 13057          | 13125         | 69     | TAG       |             |            | 1   |
| rrnL  | R         | 13144          | 14509         | 1366   |           |             |            | 18  |
| trnV  | R         | 14502          | 14566         | 65     | TAC       |             |            | -8  |
| rrnS  | R         | 14565          | 15376         | 812    |           |             |            | -2  |



**Table S9.** Annotation of the mitogenome of *Ips nitidus*.

| Gene  | Direction | Start Position | Stop Position | Length | Anticodon | Start Codon | Stop Codon | IGS |
|-------|-----------|----------------|---------------|--------|-----------|-------------|------------|-----|
| trnQ  | R         | 1              | 71            | 71     | CAT       |             |            |     |
| trnM  | F         | 87             | 158           | 72     | TTG       |             |            | 15  |
| ND2   | F         | 159            | 1169          | 1011   |           | ATT         | TAA        | 0   |
| trnW  | F         | 1170           | 1237          | 68     | TCA       |             |            | 0   |
| trnC  | R         | 1263           | 1333          | 71     | GCA       |             |            | 25  |
| trnY  | R         | 1342           | 1408          | 67     | GTA       |             |            | 8   |
| COI   | F         | 1446           | 3002          | 1557   |           | ATT         | TAA        | 37  |
| trnL2 | F         | 3022           | 3090          | 69     | TAA       |             |            | 19  |
| COII  | F         | 3091           | 3771          | 681    |           | ATC         | TAA        | 0   |
| trnK  | F         | 3802           | 3873          | 72     | CTT       |             |            | 30  |
| trnD  | F         | 3890           | 3957          | 68     | GTC       |             |            | 16  |
| ATP8  | F         | 3958           | 4122          | 165    |           | ATT         | TAG        | 0   |
| ATP6  | F         | 4119           | 4796          | 678    |           | ATA         | TAA        | -4  |
| COIII | F         | 4802           | 5584          | 783    |           | ATG         | TAA        | 5   |
| trnG  | F         | 5610           | 5675          | 66     | TCC       |             |            | 25  |
| ND3   | F         | 5676           | 6029          | 354    |           | ATT         | TAA        | 0   |
| trnA  | F         | 6041           | 6109          | 69     | TGC       |             |            | 11  |
| trnR  | F         | 6131           | 6200          | 70     | TCG       |             |            | 21  |
| trnN  | F         | 6233           | 6298          | 66     | GTT       |             |            | 32  |
| trnS1 | F         | 6299           | 6366          | 68     | GCT       |             |            | 0   |
| trnE  | F         | 6368           | 6438          | 71     | TTC       |             |            | 1   |
| trnF  | R         | 6443           | 6513          | 71     | GAA       |             |            | 4   |
| ND5   | R         | 6535           | 8280          | 1746   |           | ATC         | TAA        | 21  |
| trnH  | R         | 8281           | 8346          | 66     | GTG       |             |            | 0   |
| ND4   | R         | 8387           | 9724          | 1338   |           | ATG         | TAA        | 40  |
| ND4L  | R         | 9731           | 10018         | 288    |           | ATT         | TAG        | 6   |
| trnT  | F         | 10045          | 10111         | 67     | TGT       |             |            | 26  |
| trnP  | R         | 10112          | 10178         | 67     | TGG       |             |            | 0   |
| ND6   | F         | 10190          | 10687         | 498    |           | ATT         | TAA        | 11  |
| CytB  | F         | 10778          | 11920         | 1143   |           | ATA         | TAA        | 90  |
| trnS2 | F         | 12000          | 12069         | 70     | TGA       |             |            | 79  |
| ND1   | R         | 12089          | 13036         | 948    |           | TTG         | TAA        | 19  |
| trnL1 | R         | 13038          | 13106         | 69     | TAG       |             |            | 1   |
| rrnL  | R         | 13124          | 14486         | 1363   |           |             |            | 17  |
| trnV  | R         | 14480          | 14544         | 65     | TAC       |             |            | -7  |
| rrnS  | R         | 14543          | 15359         | 817    |           |             |            | -2  |

**Table S10.** Investigation of nucleotide composition in the mitochondrial genomes of eight bark beetles.

| <b>Species</b>                 | <b>Length</b> | <b>T %</b> | <b>C %</b> | <b>A %</b> | <b>G %</b> | <b>A+T</b> | <b>C+G</b> | <b>AT-ske</b> | <b>GC-ske</b> |
|--------------------------------|---------------|------------|------------|------------|------------|------------|------------|---------------|---------------|
| <b>Whole genome</b>            |               |            |            |            |            |            |            |               |               |
| <i>Orthotomicus erosus</i>     | 16753         | 33.48      | 18.64      | 37.21      | 10.67      | 70.69      | 29.31      | 0.0528        | -0.2722       |
| <i>Dryocoetes hectographus</i> | 15495         | 35.39      | 15.88      | 39.14      | 9.60       | 74.52      | 25.48      | 0.0503        | -0.2467       |
| <i>Polygraphus poligraphus</i> | 15586         | 33.37      | 17.46      | 37.69      | 11.49      | 71.06      | 28.95      | 0.0608        | -0.2458       |
| <i>Dendroctonus micans</i>     | 16807         | 34.57      | 15.08      | 41.16      | 9.20       | 75.72      | 24.28      | 0.0870        | -0.2421       |
| <i>Ips hauseri</i>             | 15516         | 35.45      | 16.87      | 37.90      | 9.78       | 73.35      | 26.65      | 0.0335        | -0.2662       |
| <i>Ips subelongatus</i>        | 15259         | 35.92      | 15.80      | 38.79      | 9.50       | 74.70      | 25.30      | 0.0384        | -0.2489       |
| <i>Ips typographus</i>         | 15376         | 35.18      | 16.63      | 38.22      | 9.97       | 73.40      | 26.60      | 0.0414        | -0.2501       |
| <i>Ips nitidus</i>             | 15359         | 35.92      | 15.80      | 38.79      | 9.50       | 74.70      | 25.30      | 0.0384        | -0.2489       |
| Average ( <i>Ips</i> )         | 15425         | 34.78      | 16.61      | 38.55      | 10.06      | 73.33      | 26.67      | 0.0514        | -0.2463       |
| <b>PCGs</b>                    |               |            |            |            |            |            |            |               |               |
| <i>Orthotomicus erosus</i>     | 11162         | 40.09      | 17.31      | 27.78      | 14.82      | 67.87      | 32.13      | -0.1814       | -0.0775       |
| <i>Dryocoetes hectographus</i> | 11157         | 41.76      | 13.62      | 31.50      | 13.12      | 73.25      | 26.75      | -0.1401       | -0.0188       |
| <i>Polygraphus poligraphus</i> | 11091         | 40.24      | 17.05      | 28.78      | 13.93      | 69.02      | 30.98      | -0.1660       | -0.1007       |
| <i>Dendroctonus micans</i>     | 11124         | 41.68      | 14.43      | 31.57      | 12.32      | 73.25      | 26.75      | -0.1379       | -0.0786       |
| <i>Ips hauseri</i>             | 11177         | 41.06      | 15.95      | 29.14      | 13.85      | 70.20      | 29.80      | -0.1698       | -0.0705       |
| <i>Ips subelongatus</i>        | 11196         | 42.43      | 14.22      | 30.44      | 12.92      | 72.87      | 27.13      | -0.1645       | -0.0481       |
| <i>Ips typographus</i>         | 11196         | 41.94      | 14.83      | 30.16      | 13.07      | 72.10      | 27.90      | -0.1634       | -0.0629       |
| <i>Ips nitidus</i>             | 11190         | 41.36      | 15.39      | 29.85      | 13.40      | 71.21      | 28.79      | -0.1616       | -0.0689       |
| Average ( <i>Ips</i> )         | 11162         | 41.32      | 15.35      | 29.90      | 13.43      | 71.22      | 28.78      | -0.1606       | -0.0658       |
| <b>rRNA</b>                    |               |            |            |            |            |            |            |               |               |
| <i>Orthotomicus erosus</i>     | 2095          | 39.62      | 7.64       | 36.13      | 16.61      | 75.75      | 24.25      | -0.0460       | 0.3701        |
| <i>Dryocoetes hectographus</i> | 2061          | 37.99      | 7.96       | 36.68      | 17.37      | 74.67      | 25.33      | -0.0175       | 0.3716        |
| <i>Polygraphus poligraphus</i> | 2016          | 39.08      | 8.02       | 35.80      | 17.09      | 74.88      | 25.12      | -0.0438       | 0.3611        |
| <i>Dendroctonus micans</i>     | 2072          | 43.29      | 6.71       | 36.34      | 13.66      | 79.63      | 20.37      | -0.0873       | 0.3412        |
| <i>Ips hauseri</i>             | 2159          | 39.97      | 6.67       | 38.72      | 14.64      | 78.69      | 21.31      | -0.0159       | 0.3739        |
| <i>Ips subelongatus</i>        | 2177          | 40.24      | 6.66       | 38.31      | 14.79      | 78.55      | 21.45      | -0.0246       | 0.3790        |
| <i>Ips typographus</i>         | 2178          | 40.22      | 6.80       | 38.06      | 14.92      | 78.28      | 21.72      | -0.0276       | 0.3742        |
| <i>Ips nitidus</i>             | 2180          | 39.86      | 7.16       | 37.98      | 15.00      | 77.84      | 22.16      | -0.0242       | 0.3540        |
| Average ( <i>Ips</i> )         | 2117          | 40.03      | 7.20       | 37.25      | 15.51      | 77.29      | 22.71      | -0.0358       | 0.3656        |
| <b>tRNA</b>                    |               |            |            |            |            |            |            |               |               |
| <i>Orthotomicus erosus</i>     | 1480          | 35.34      | 11.62      | 39.73      | 13.31      | 75.07      | 24.93      | 0.0585        | 0.0678        |
| <i>Dryocoetes hectographus</i> | 1443          | 37.35      | 9.70       | 39.29      | 13.65      | 76.65      | 23.35      | 0.0253        | 0.1691        |
| <i>Polygraphus poligraphus</i> | 1443          | 35.47      | 12.67      | 36.85      | 15.00      | 72.32      | 27.68      | 0.0191        | 0.0842        |
| <i>Dendroctonus micans</i>     | 1419          | 37.56      | 10.50      | 39.18      | 12.76      | 76.74      | 23.26      | 0.0211        | 0.0970        |
| <i>Ips hauseri</i>             | 1438          | 37.48      | 9.94       | 38.73      | 13.84      | 76.22      | 23.78      | 0.0164        | 0.1637        |
| <i>Ips subelongatus</i>        | 1431          | 37.32      | 9.92       | 40.39      | 12.37      | 77.71      | 22.29      | 0.0396        | 0.1097        |
| <i>Ips typographus</i>         | 1441          | 35.60      | 10.96      | 40.67      | 12.77      | 76.27      | 23.73      | 0.0664        | 0.0760        |
| <i>Ips nitidus</i>             | 1443          | 36.17      | 10.46      | 40.12      | 13.24      | 76.30      | 23.70      | 0.0518        | 0.1170        |
| Average ( <i>Ips</i> )         | 1442          | 36.54      | 10.72      | 39.37      | 13.37      | 75.91      | 24.09      | 0.0373        | 0.1106        |

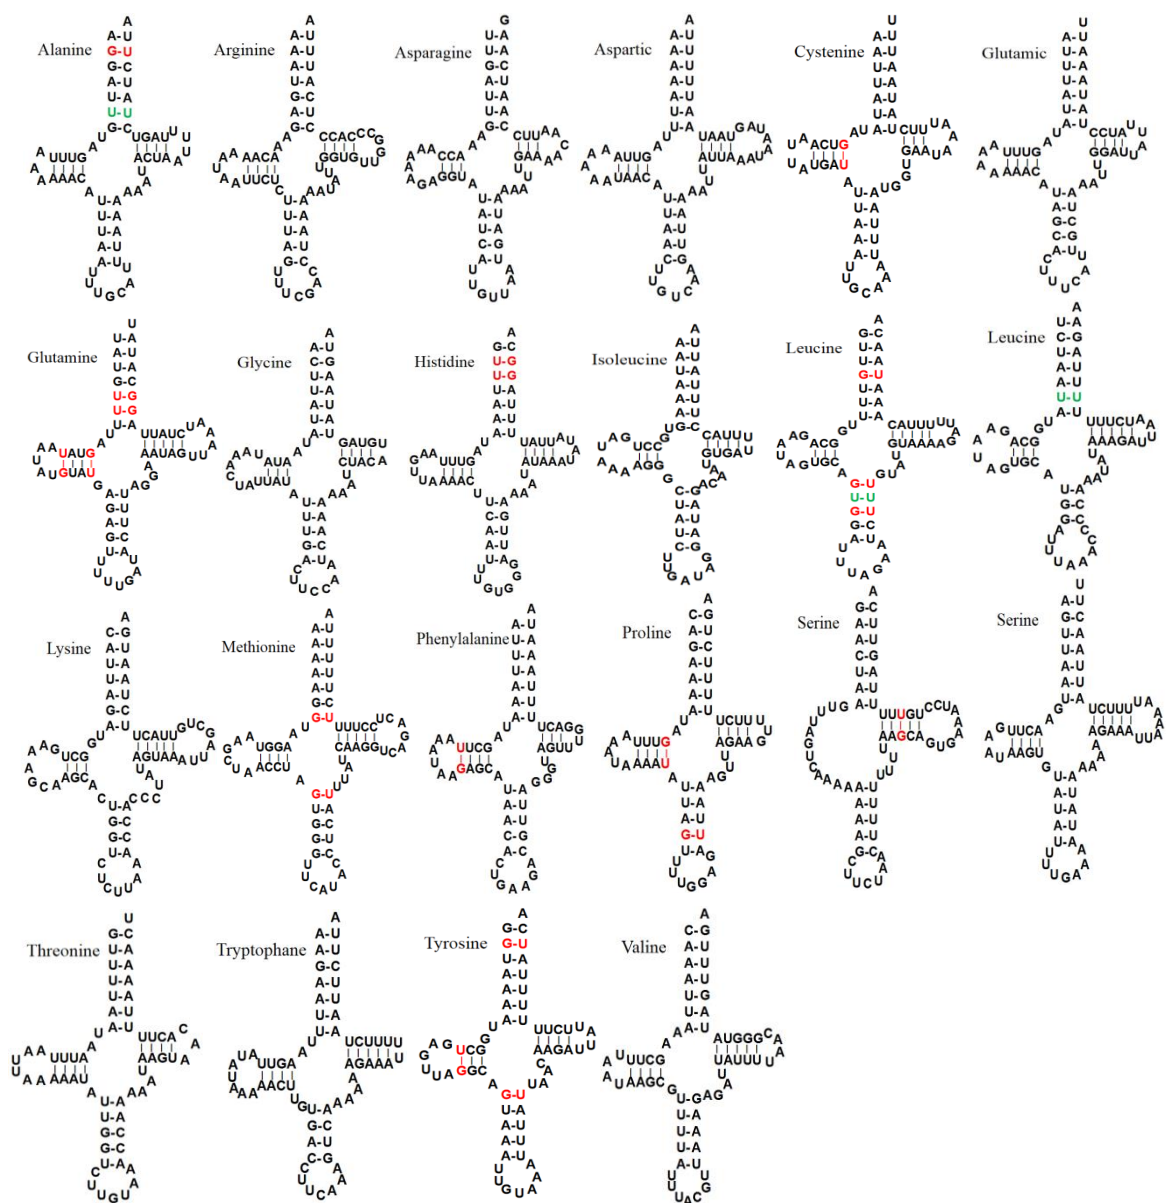

**Figure S1.** Secondary structures for tRNA genes from the mtDNA of *Dryocoetes hectographus*

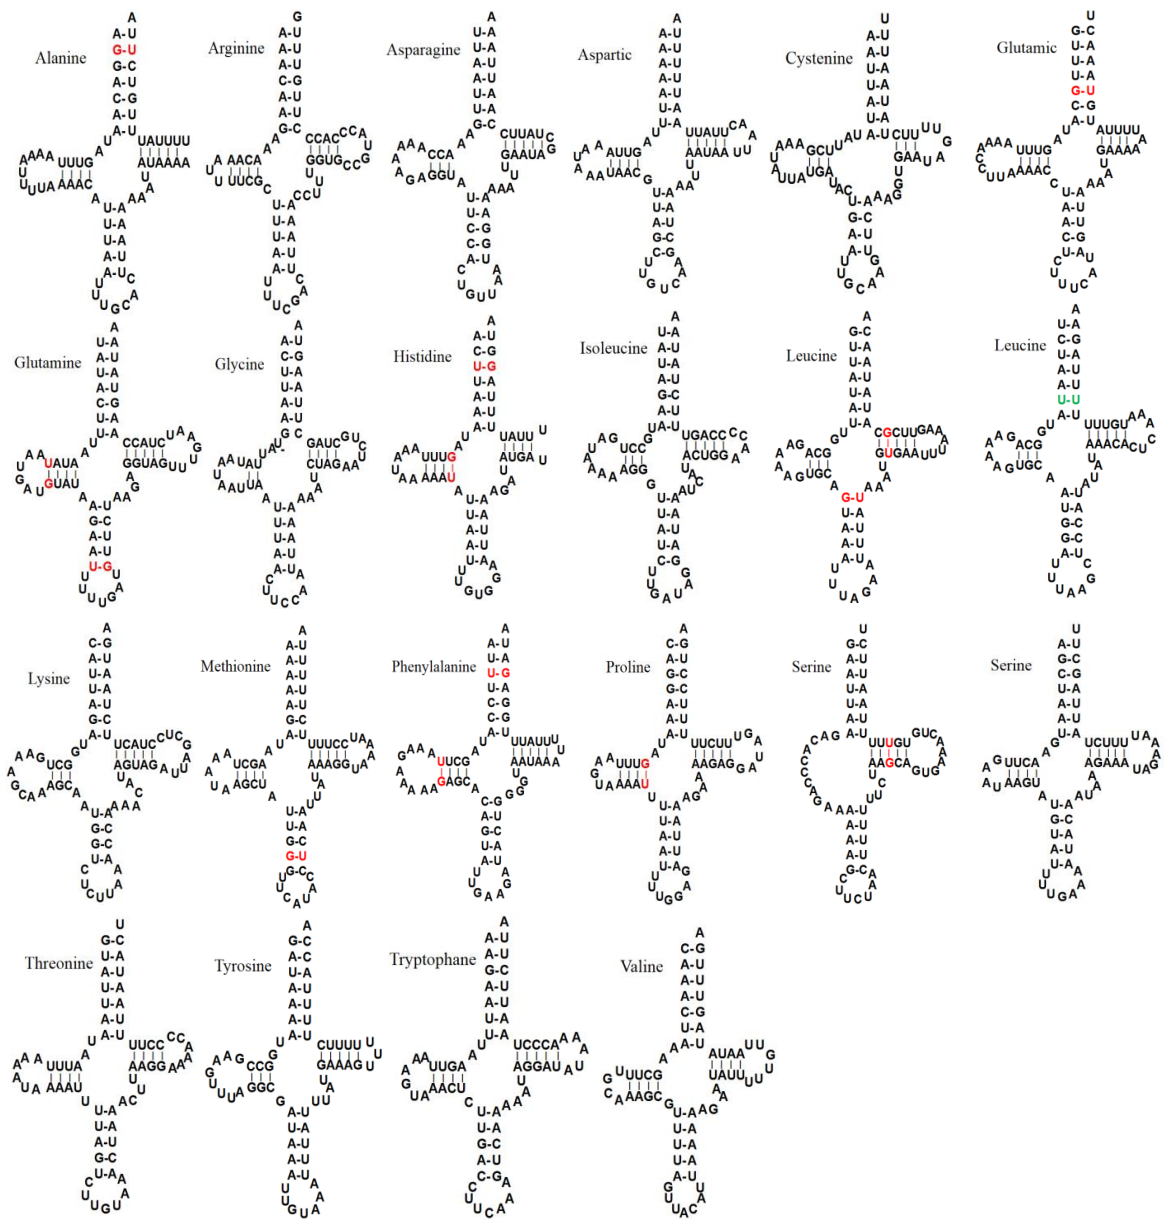

**Figure S2.** Secondary structures for tRNA genes from the mtDNA of *Orthotomicus erosus*

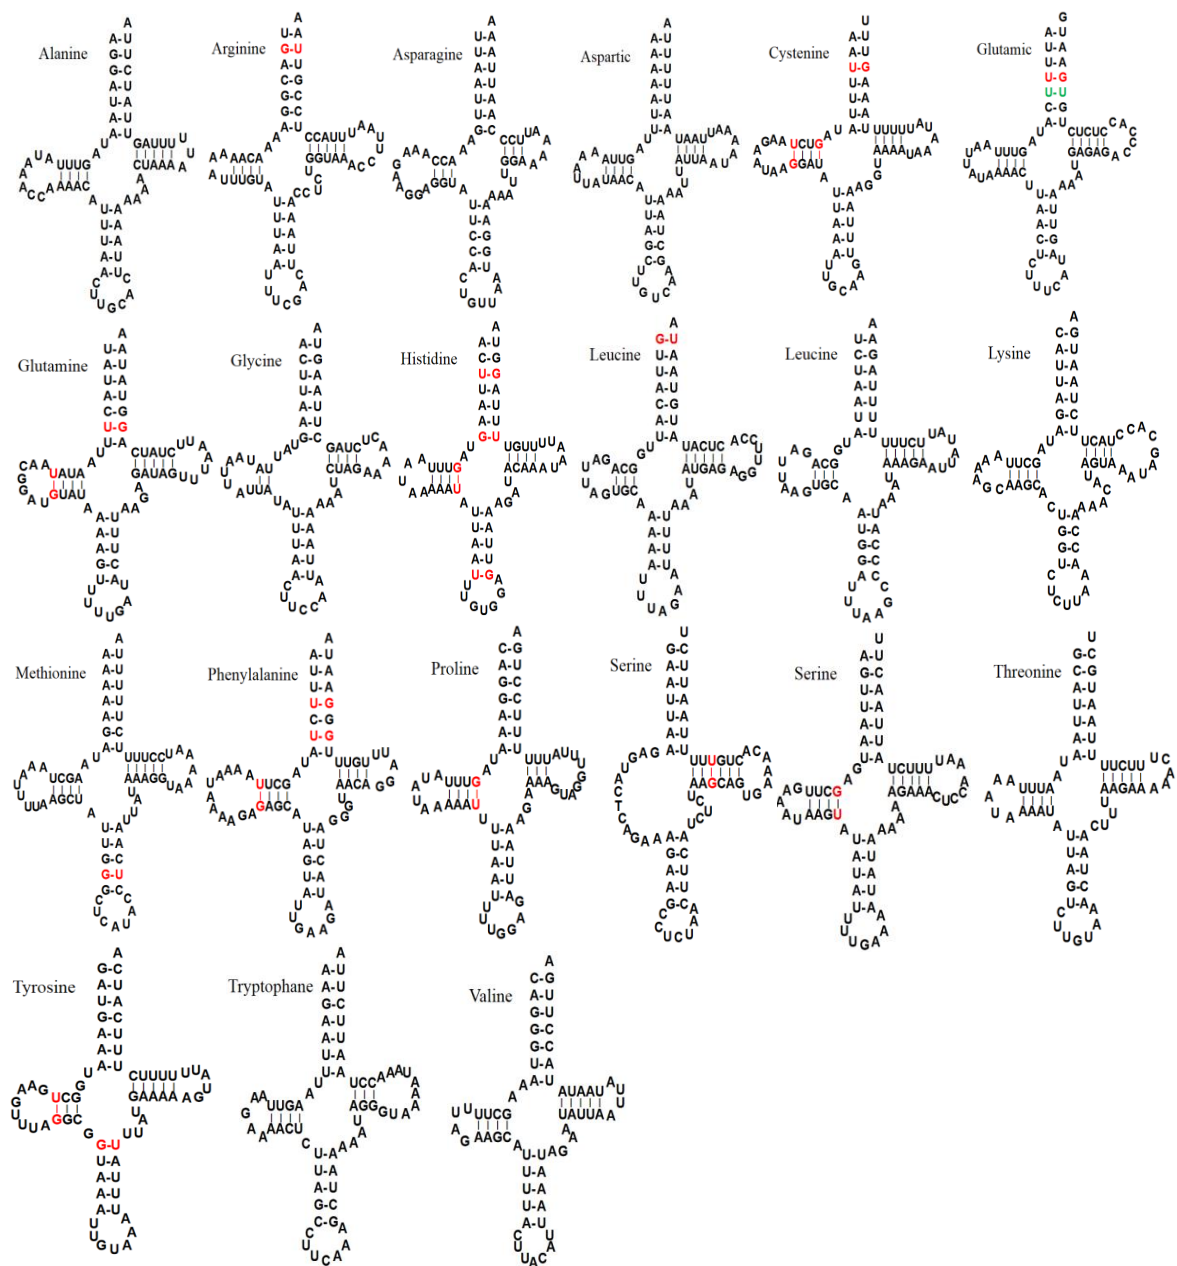

**Figure S3.** Secondary structures for tRNA genes from the mtDNA of *Ips typographus*

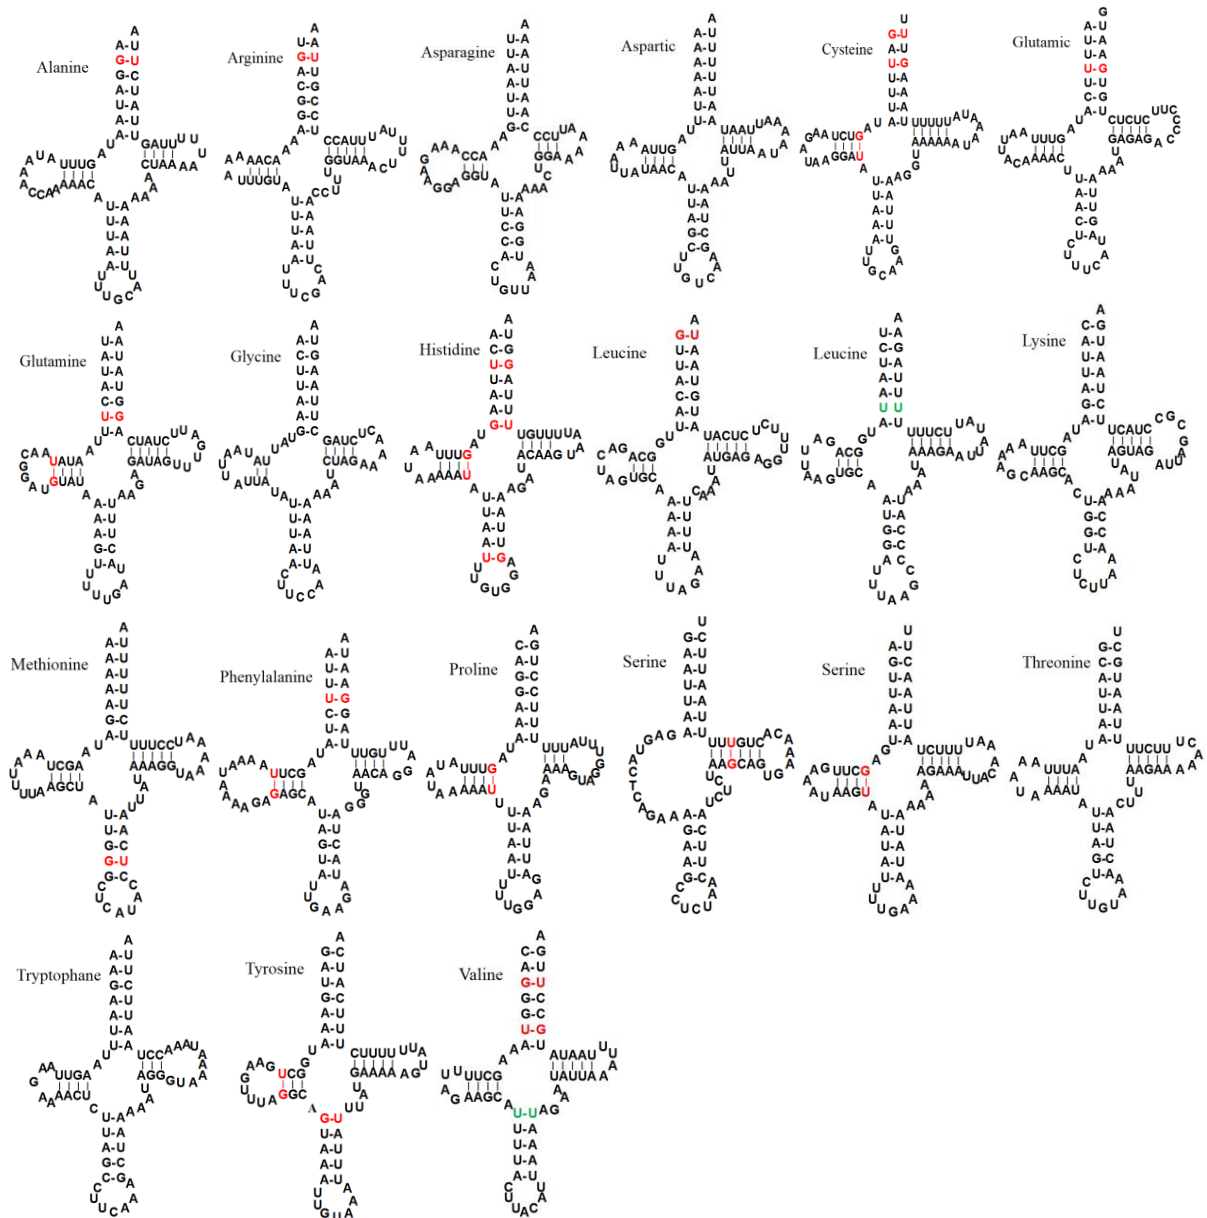

**Figure S4.** Secondary structures for tRNA genes from the mtDNA of *Ips nitidus*

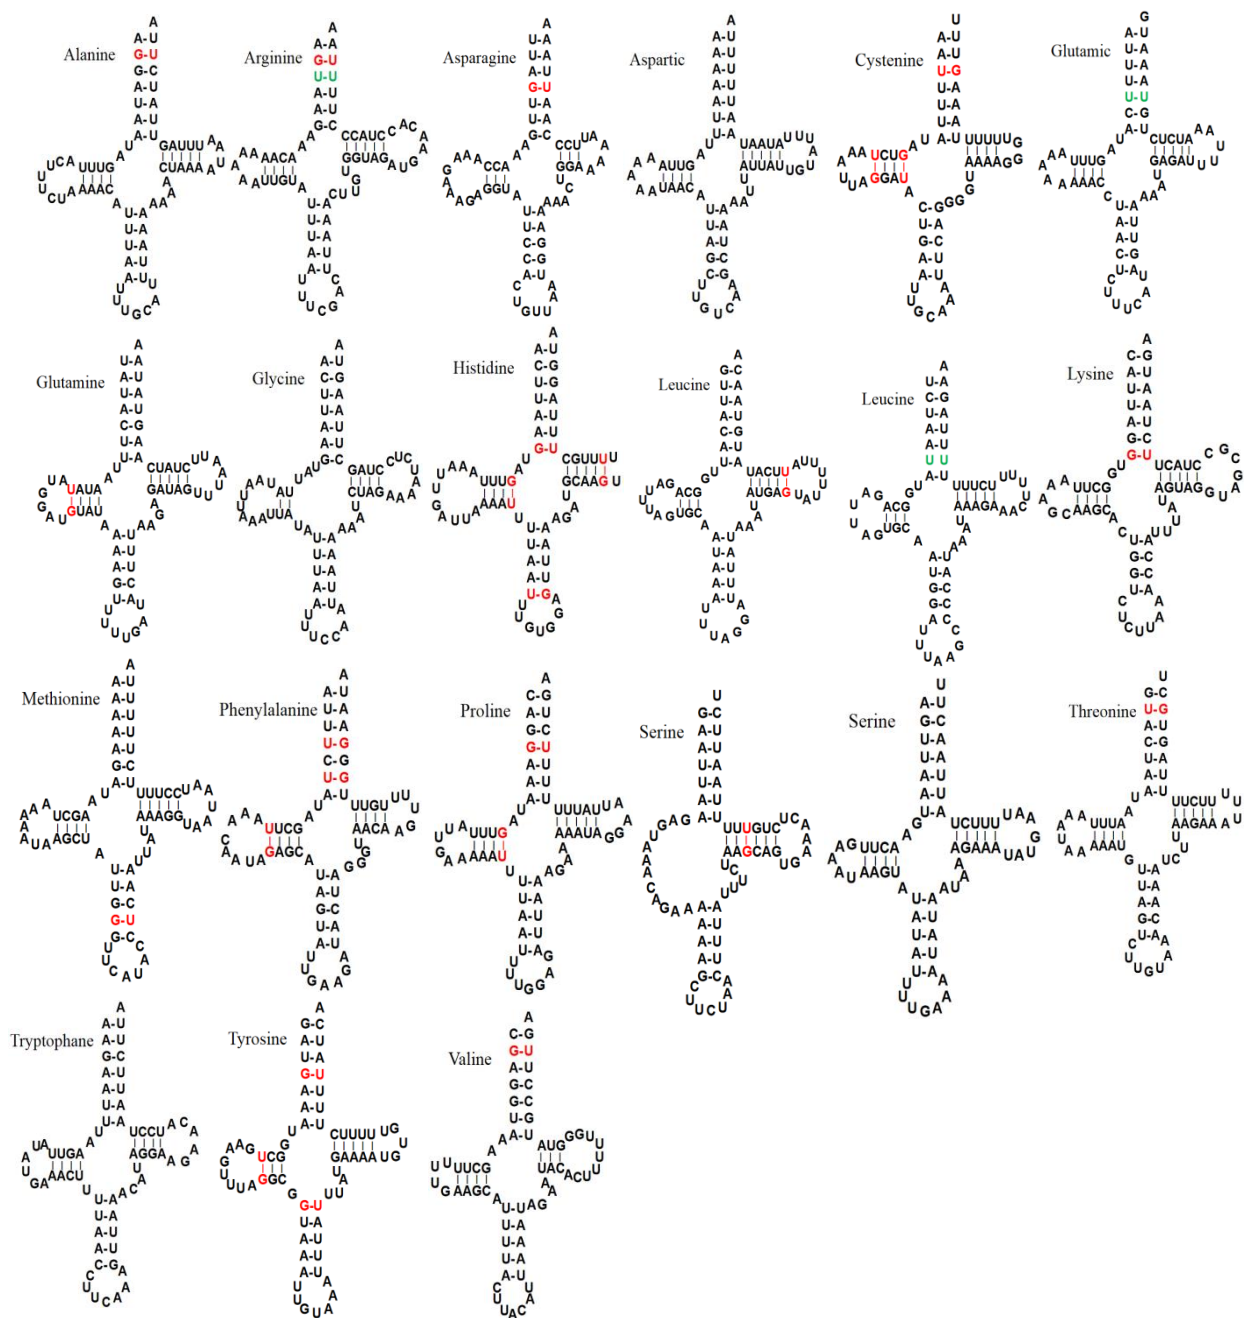

**Figure S5.** Secondary structures for tRNA genes from the mtDNA of *Ips hauseri*



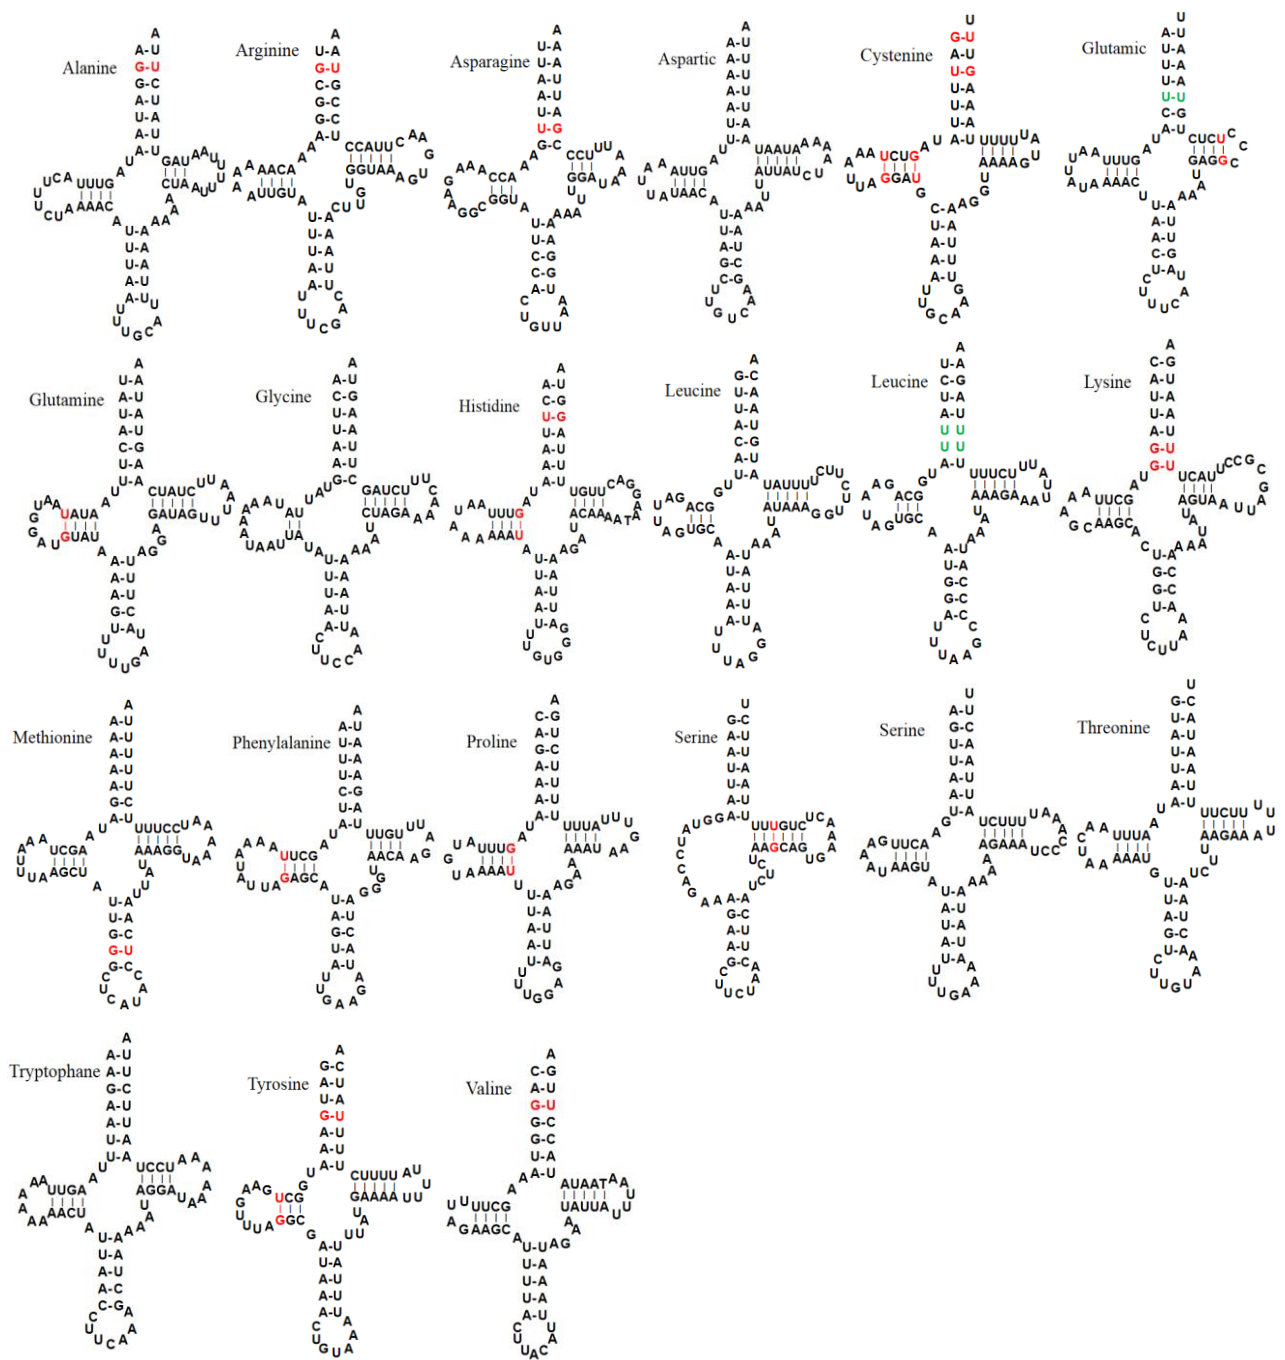

**Figure S6.** Secondary structures for tRNA genes from the mtDNA of *Ips subelongatus*



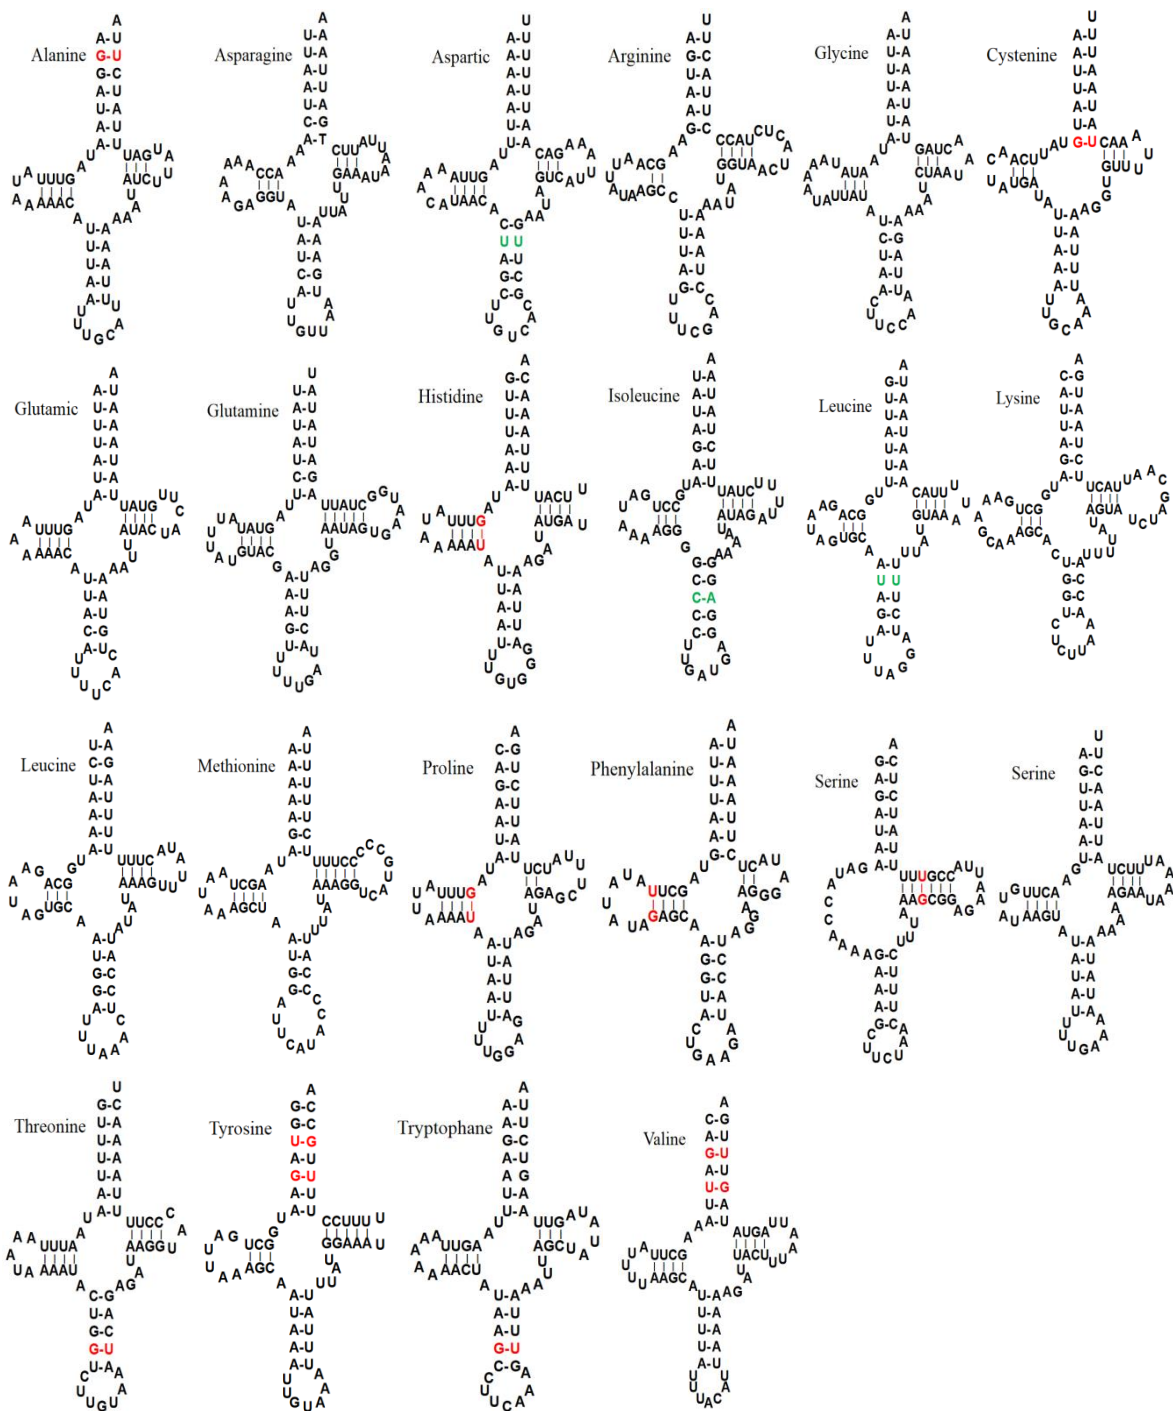

**Figure S7.** Secondary structures for tRNA genes from the mtDNA of *Dendroctonus micans*

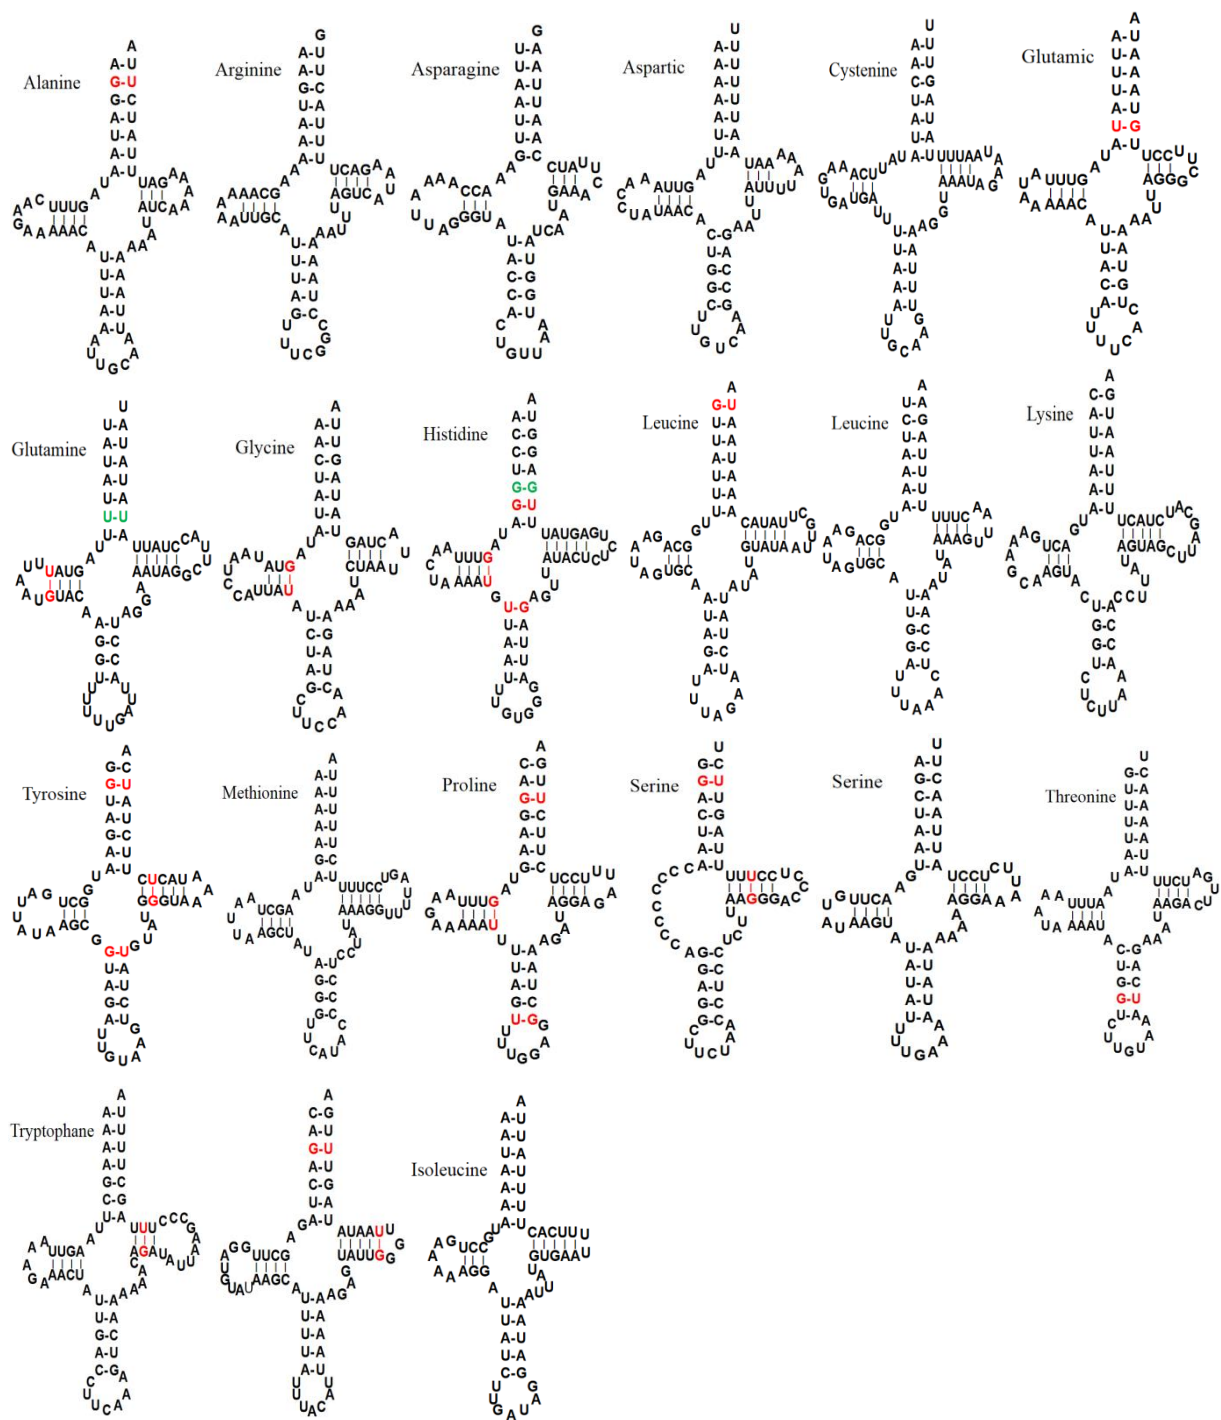

**Figure S8.** Secondary structures for tRNA genes from the mtDNA of *Polygraphus poligraphus*

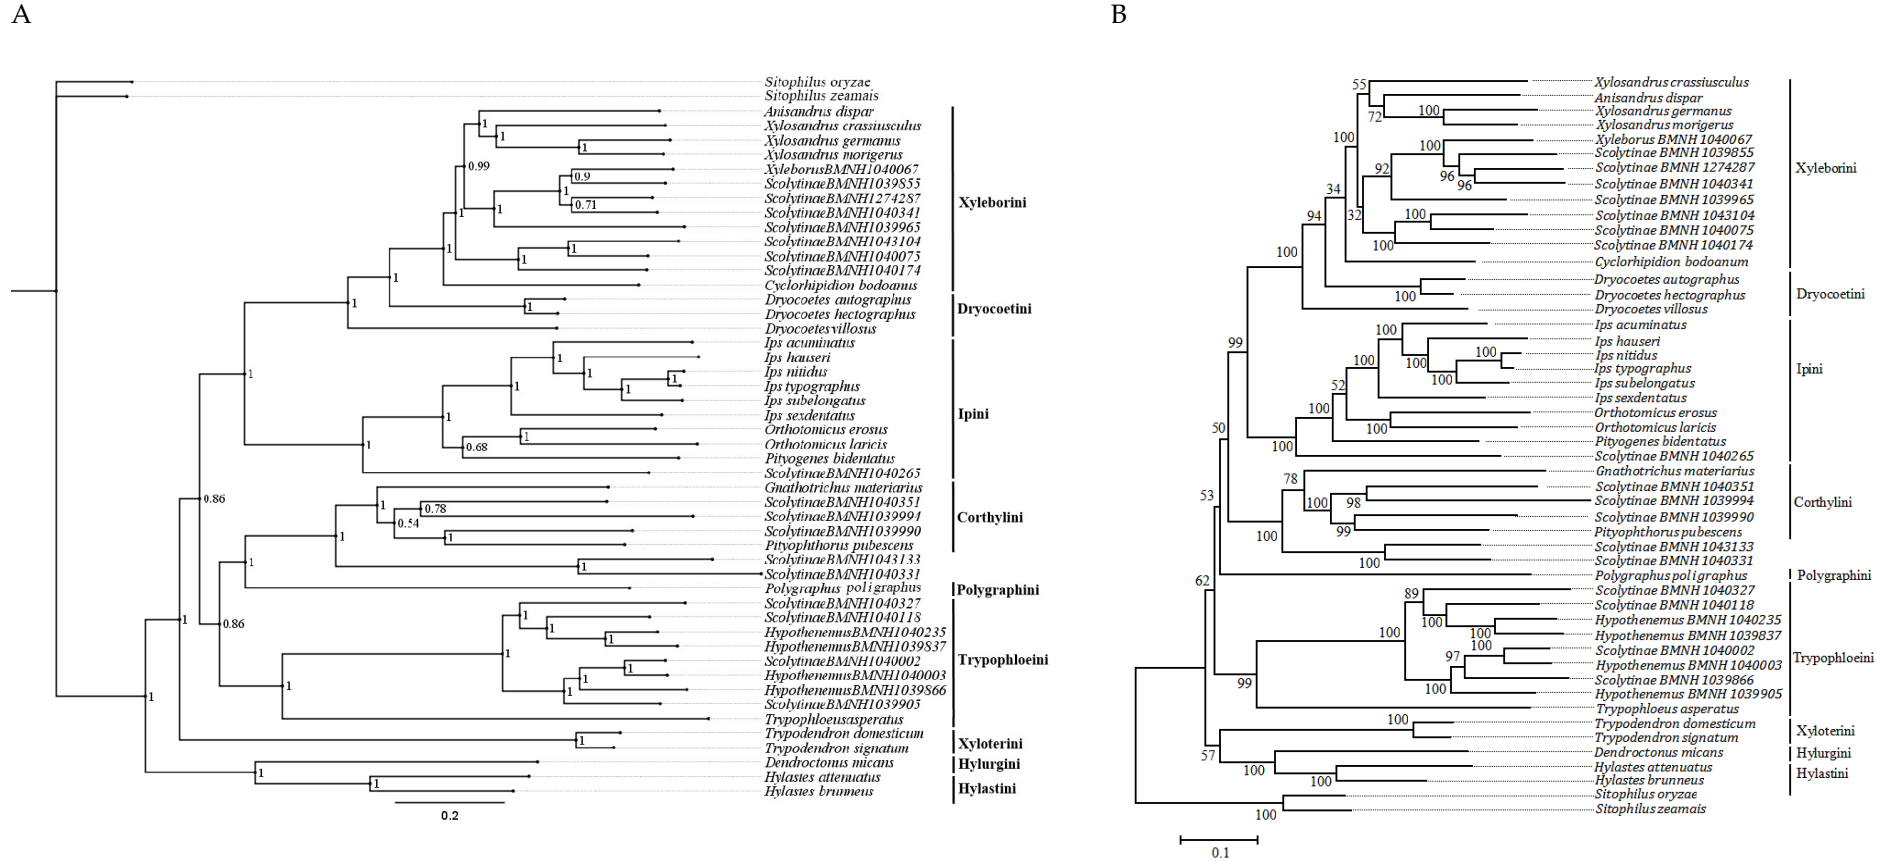

Supplement: s1 [file s1]
